# Supplementary material for: Estimating marine carbon uptake in the northeast Pacific using a neural network approach
Source: Copernicus journal article supplement (doi:10.5194/bg-20-3919-2023), 2023-09-27
Supplement: Supplementary file 1 [file bg-20-3919-2023-supplement.pdf]

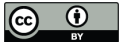

*Supplement of*

## **Estimating marine carbon uptake in the northeast Pacific using a neural network approach**

**Patrick J. Duke et al.**

*Correspondence to:* Patrick J. Duke ([pjduke@ucalgary.ca](mailto:pjduke@ucalgary.ca))

The copyright of individual parts of the supplement might differ from the article licence.

## Contents of this file

Text S1

Figure S1

Figure S2

5 Figure S3

Figure S4

Figure S5

Figure S6

Figure S7

10 Table S1

Table S2

## Text S1

The reported  $f\text{CO}_2$  estimates were converted to  $p\text{CO}_2$  using the equation S1 (Körtzinger, 1999):

$$15 \quad p\text{CO}_2 = f\text{CO}_2 \times \exp\left[P_{\text{atm}}^{\text{surf}} \frac{B+(2\delta)}{RT}\right], \quad (\text{S1})$$

where  $P_{\text{atm}}^{\text{surf}}$  is the total atmospheric surface pressure, B and  $\delta$  are virial coefficients (Weiss, 1974), R is the gas constant and T is the absolute temperature. National Centers for Environmental Prediction (NCEP) monthly mean sea level pressure was used for  $P_{\text{atm}}^{\text{surf}}$  (Kalnay et al., 1996).

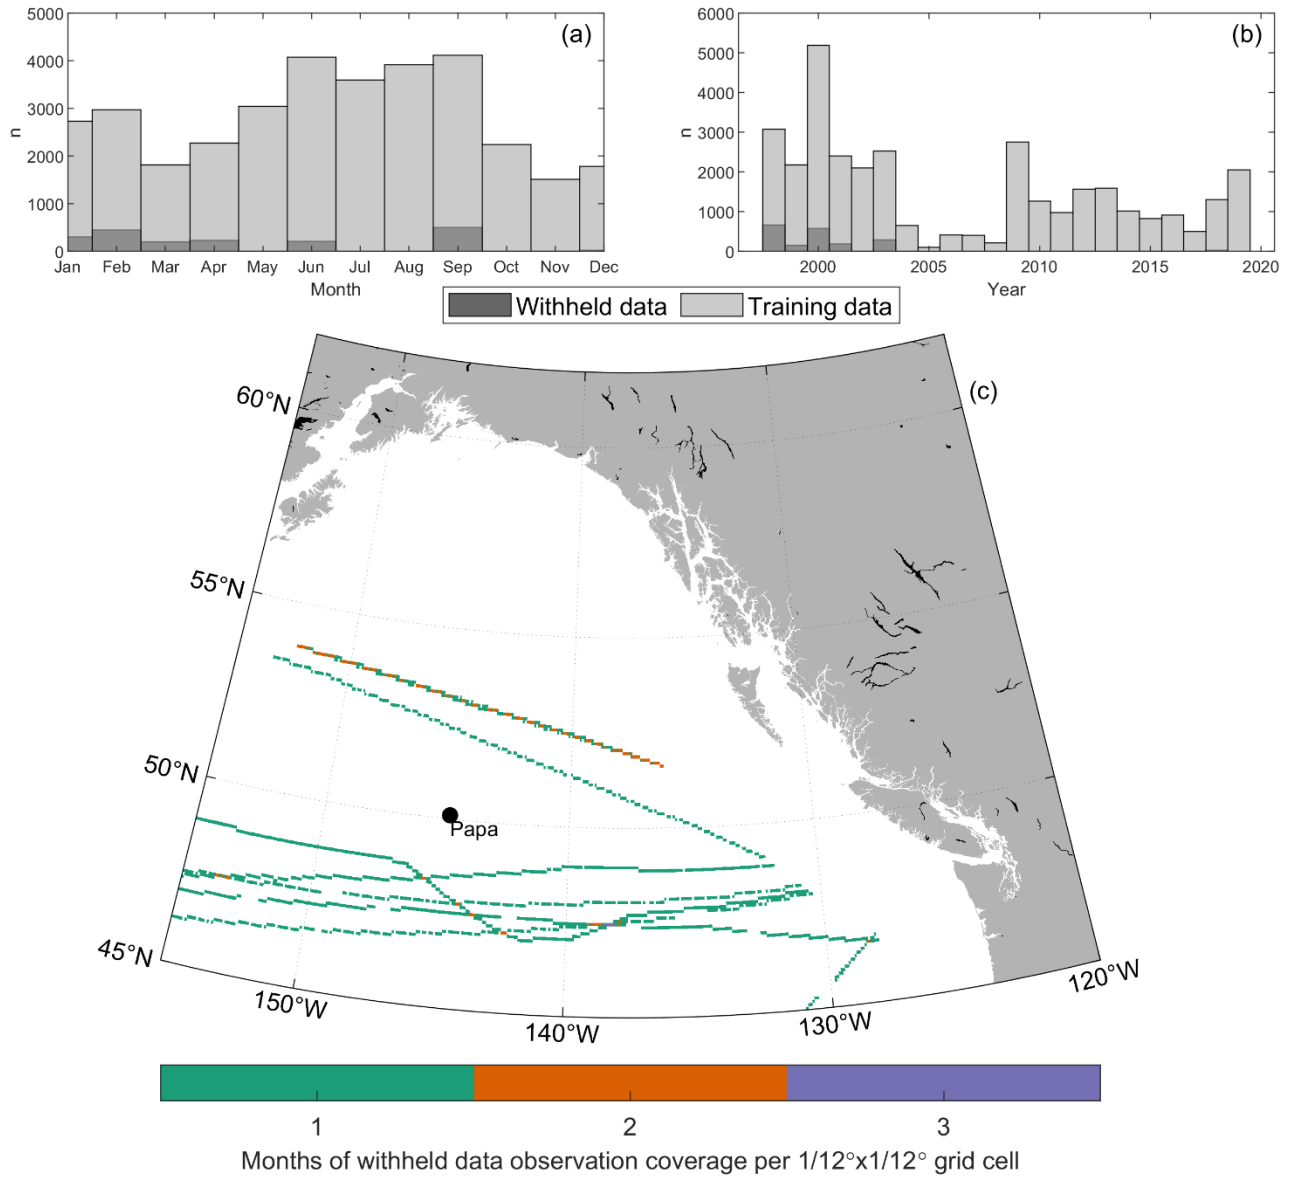

20 **Figure S1** Withheld data (dark grey) distribution in (a) months, and (b) years relative to training data (light grey), and (c) geographically as the number of months of observational coverage per  $1/12^\circ \times 1/12^\circ$  grid cell. Ocean Station Papa is shown for reference.

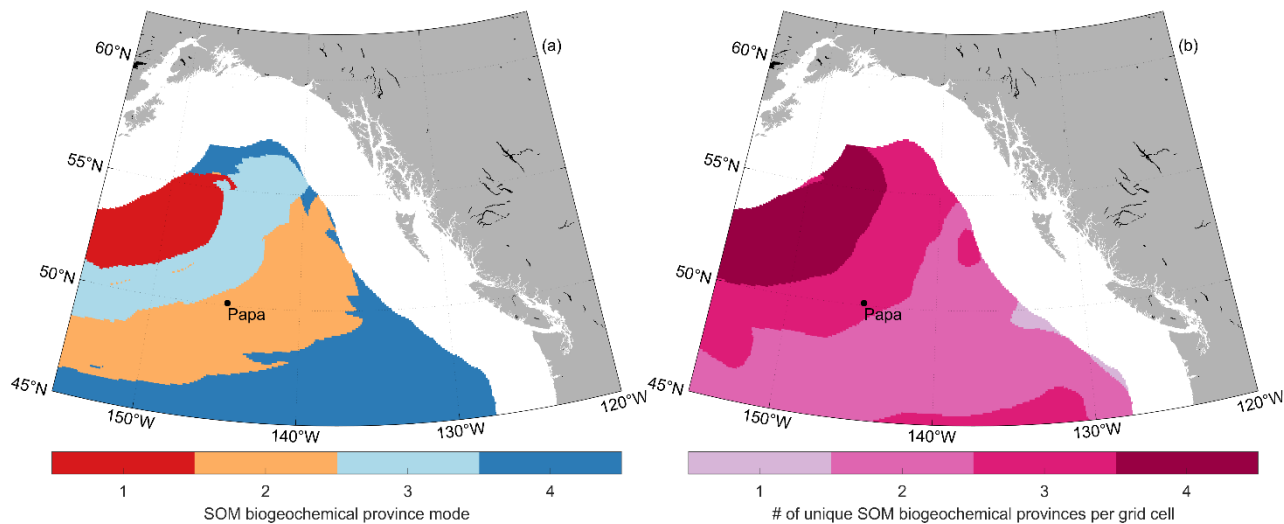

25 **Figure S2 Mapped (a) mode of SOM biogeochemical provinces (i.e., most frequent occurrence), and (b) the number of unique SOM biogeochemical provinces each grid cell belongs to for each month from January 1998 to December 2019.**

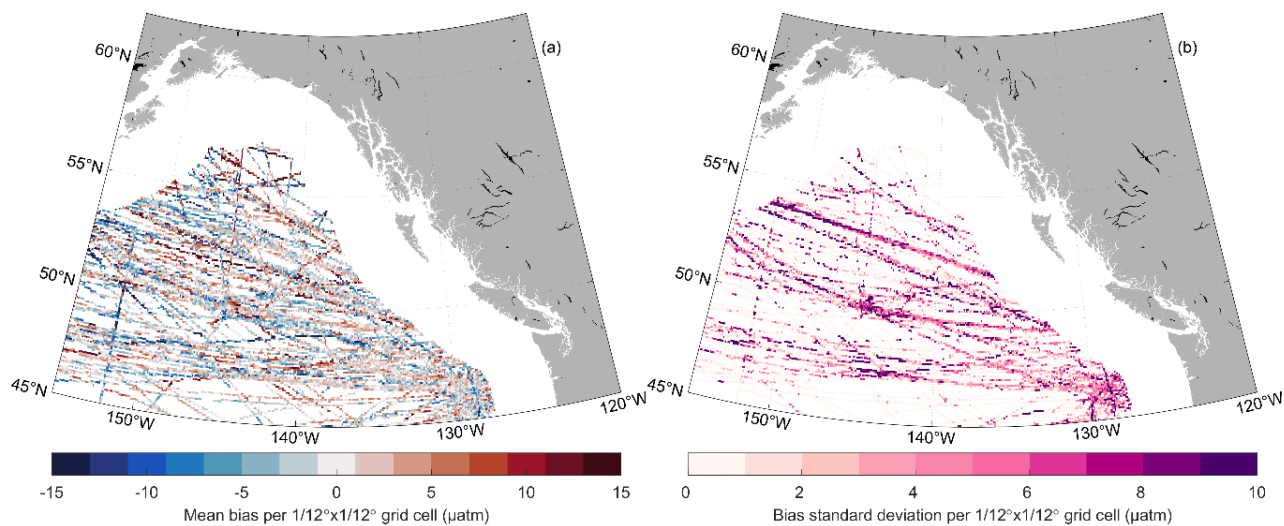

**Figure S3 Mapped mean bias and standard deviation in residuals between ANN-NEP  $p\text{CO}_2$  estimate and  $1/12^\circ \times 1/12^\circ$  gridded SOCAT data.**

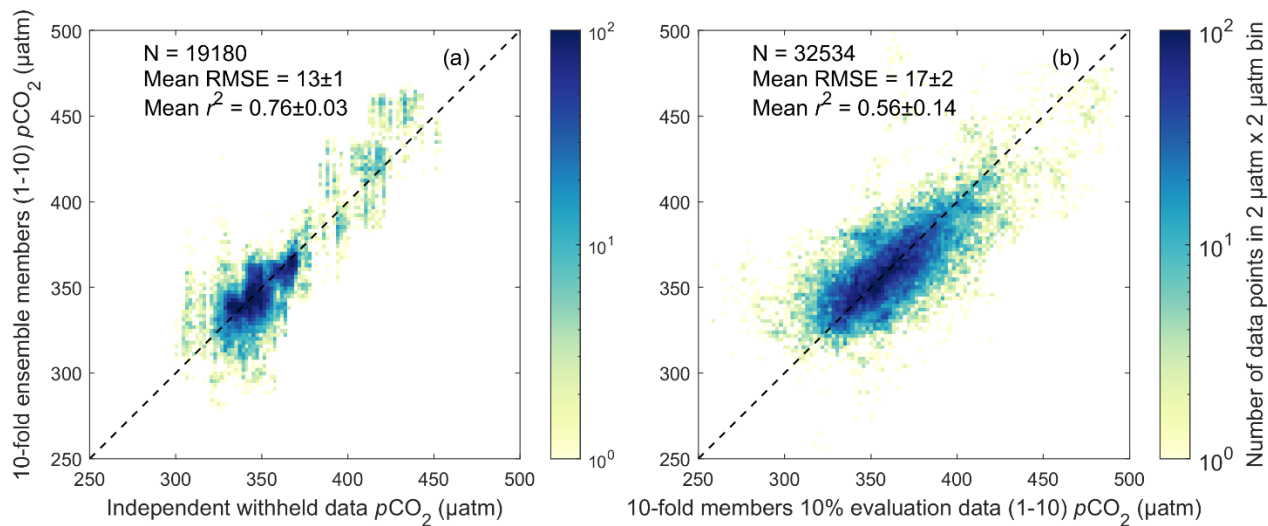

30 **Figure S4 10-fold cross-evaluation (Section 2.4) individual ensemble member estimated  $p\text{CO}_2$  against the (a) independent withheld data, and (b) 10% 10-fold evaluation data specific to that ensemble member. Mean root mean squared error (RMSE) and coefficient of determination ( $r^2$ ) are across all individual ensemble members. Data is binned into  $2 \mu\text{atm}$  by  $2 \mu\text{atm}$  bins. The dashed black line represents a perfect fit of slope ( $c_1$ ) = 1 and intercept = 0.**

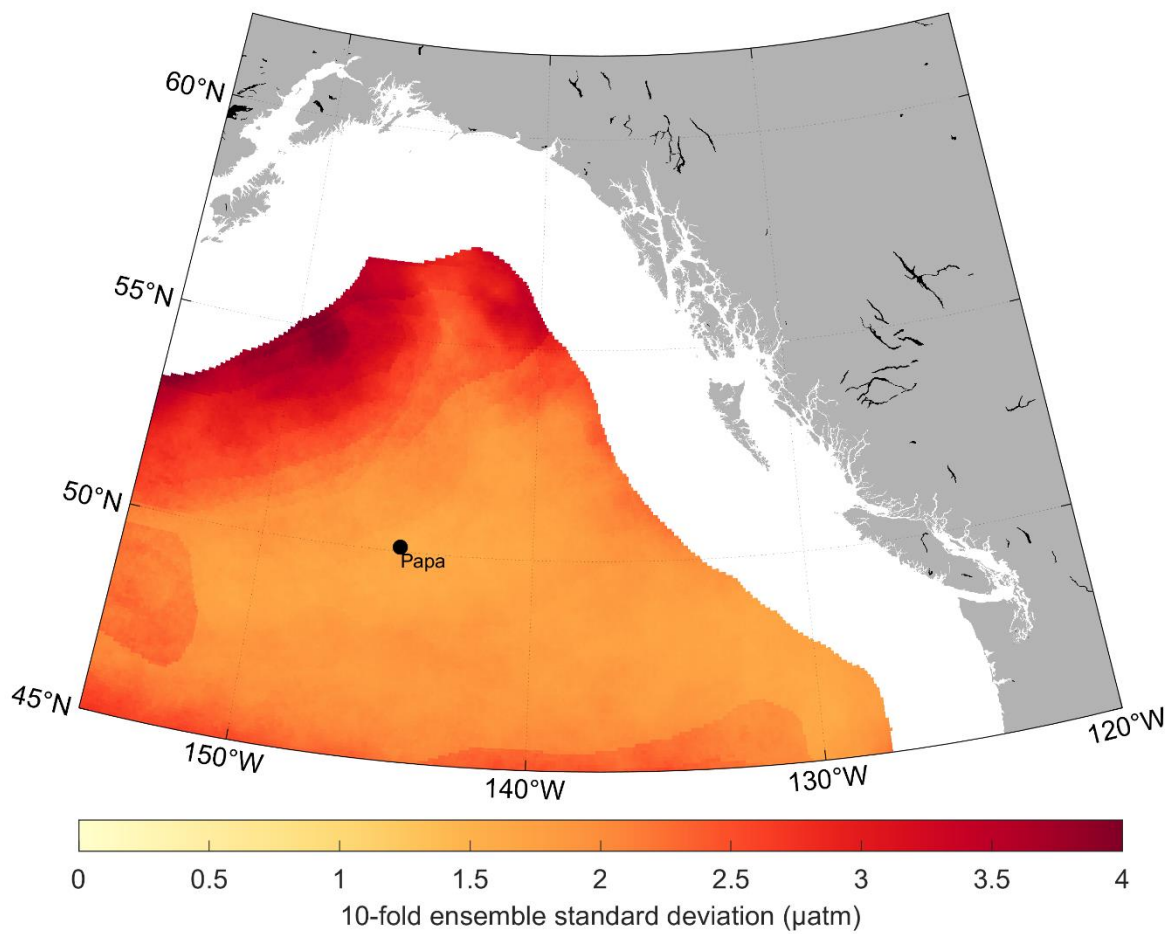

35 **Figure S5 Mean  $p\text{CO}_2$  standard deviation between ANN-NEP 10-fold ensemble members. Ocean Station Papa is shown for reference.**

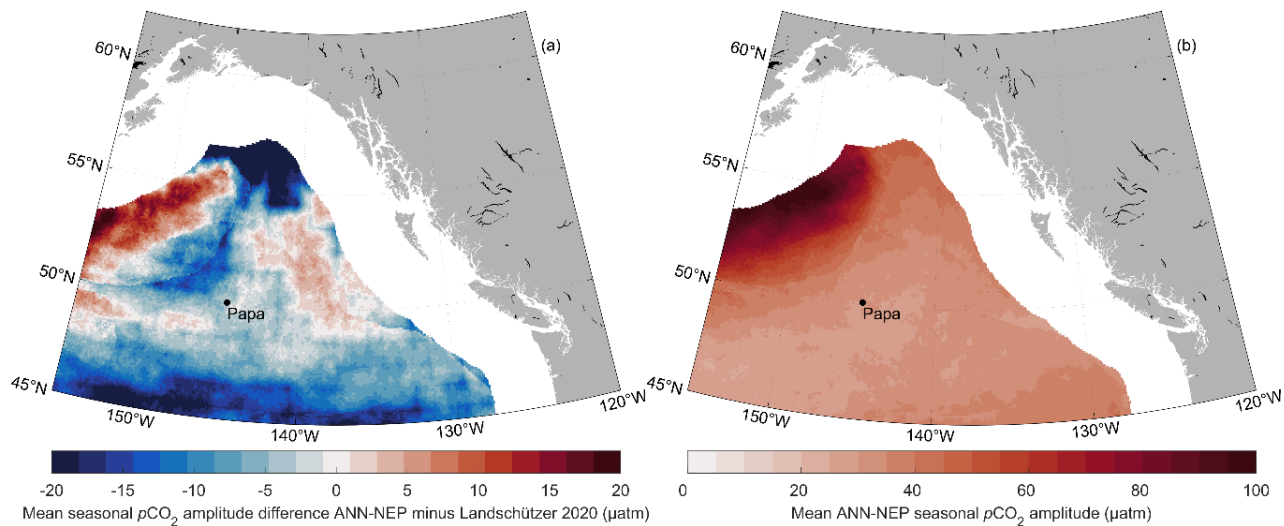

40 **Figure S6 (a) Mean difference in the surface ocean  $p\text{CO}_2$  seasonal amplitude in  $\mu\text{atm}$  between the ANN-NEP estimate (this study) and the Landschützer et al. (2020) global product. Positive (negative) differences indicate higher  $p\text{CO}_2$  seasonal amplitude for the ANN-NEP (Landschützer et al. (2020)) estimate. The Landschützer et al. (2020) estimates were interpolated to the  $1/12^\circ \times 1/12^\circ$  grid of this study. (b) Mean ANN-NEP seasonal surface ocean  $p\text{CO}_2$  seasonal amplitude in  $\mu\text{atm}$ . Ocean Station Papa is shown for reference.**

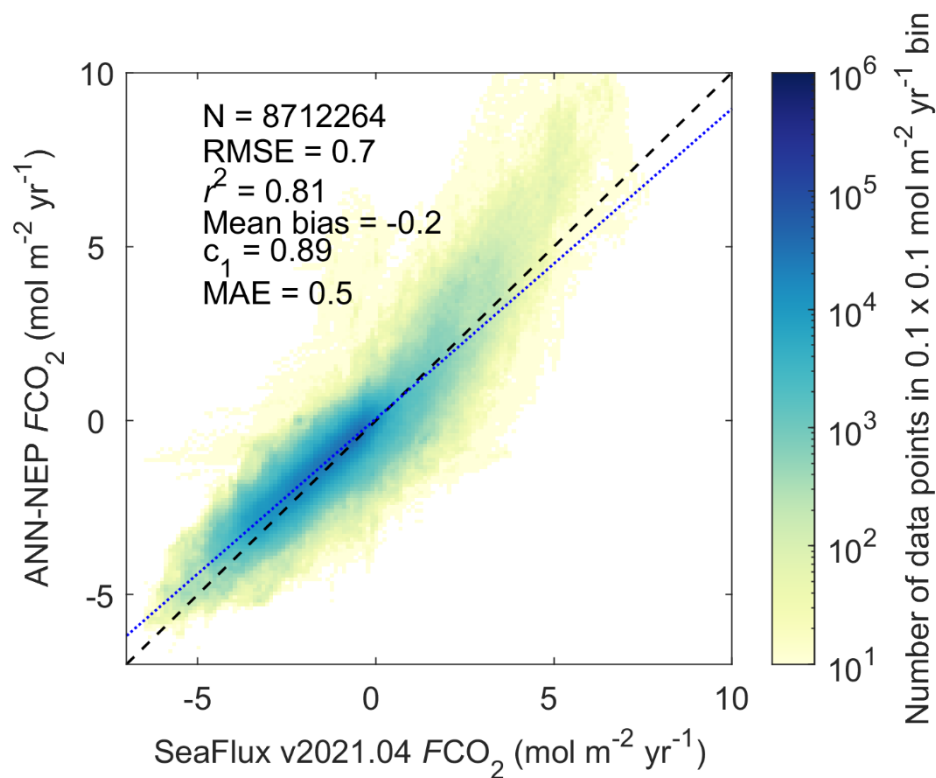

45 **Figure S7** Property to property plot of air-sea CO<sub>2</sub> flux density values calculated from ANN-NEP and from SeaFlux v2021.04 (Fay et al., 2021). The SeaFlux estimates were interpolated to the 1/12°x1/12° grid of this study. Number of overlapping grid cells within the study area (N), root mean squared error (RMSE), coefficient of determination ( $r^2$ ), mean absolute error (MAE), mean bias (calculated as the mean residual), and the slope of the linear regression ( $c_1$ ). The observed linear relationship is represented by the dotted blue line. Data is binned into 0.1 by 0.1 mol m<sup>-2</sup> yr<sup>-1</sup> bins. The dashed black line represents a perfect fit of slope ( $c_1$ ) = 1 and intercept = 0. Colorbar shows data density on a log scale.

50



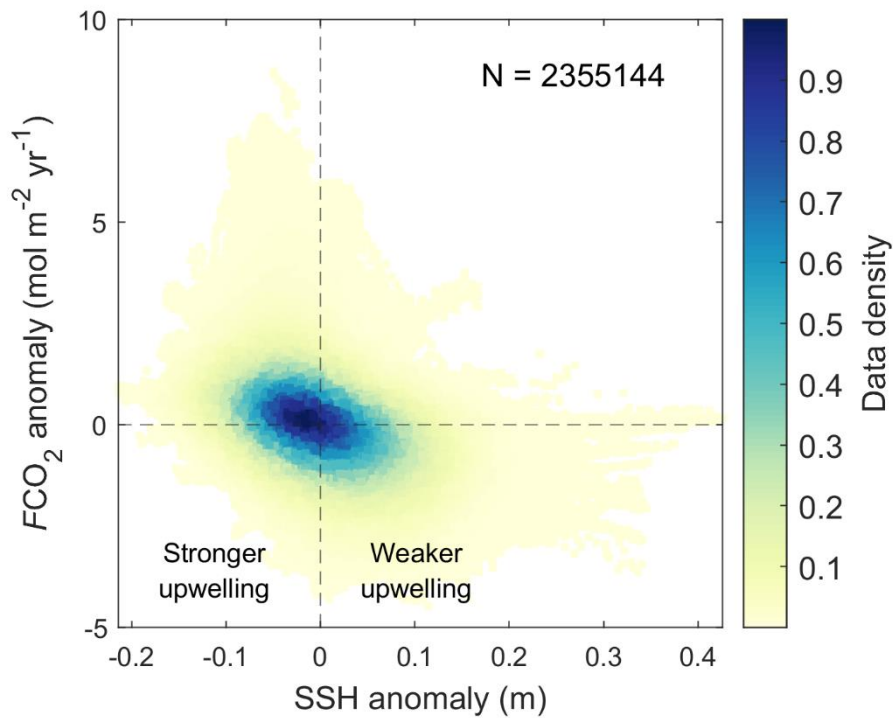

**Figure S8 Property to property plot of air-sea CO<sub>2</sub> flux density anomalies and sea surface height (SSH) anomalies (grid cell by grid cell) in the subpolar Alaskan Gyre region of our study area (latitudes north of 52° N). Stronger (weaker) upwelling label relates to gyre upwelling strength driven by winds enhancing (damping) Ekman pumping and depressing (elevating) SSH.**

55 **Table S1 Regional high-resolution artificial neural network Northeast Pacific (ANN-NEP)  $p\text{CO}_2$  product performance against all SOCAT  $p\text{CO}_2$  observation data grouped by year and month. Number of observations (N), root mean squared error (RMSE), coefficient of determination ( $r^2$ ), and mean bias (calculated as the mean residual).**

|              | <b>N</b> | <b>RMSE</b> | <b><math>r^2</math></b> | <b>Mean bias</b> |
|--------------|----------|-------------|-------------------------|------------------|
| <i>Year</i>  |          |             |                         |                  |
| 1998         | 3085     | 8.1         | 0.73                    | -1.4             |
| 1999         | 2184     | 7.5         | 0.91                    | 1.4              |
| 2000         | 5195     | 8.1         | 0.93                    | 0.0              |
| 2001         | 2404     | 5.7         | 0.96                    | 1.2              |
| 2002         | 2110     | 7.1         | 0.91                    | 1.0              |
| 2003         | 2526     | 5.2         | 0.84                    | -1.3             |
| 2004         | 652      | 4.5         | 0.94                    | 1.2              |
| 2005         | 110      | 6.8         | 0.69                    | -3.6             |
| 2006         | 413      | 3.3         | 0.93                    | -2.6             |
| 2007         | 405      | 6.4         | 0.87                    | -2.8             |
| 2008         | 217      | 4.0         | 0.95                    | -1.3             |
| 2009         | 2751     | 5.0         | 0.94                    | -0.4             |
| 2010         | 1267     | 6.5         | 0.96                    | 1.9              |
| 2011         | 980      | 9.1         | 0.87                    | -1.0             |
| 2012         | 1567     | 6.1         | 0.93                    | 1.3              |
| 2013         | 1593     | 4.3         | 0.99                    | 0.9              |
| 2014         | 1017     | 5.1         | 0.95                    | -1.5             |
| 2015         | 836      | 9.1         | 0.95                    | 1.5              |
| 2016         | 919      | 6.3         | 0.91                    | -0.4             |
| 2017         | 511      | 4.7         | 0.89                    | 1.0              |
| 2018         | 1303     | 5.7         | 0.94                    | 1.2              |
| 2019         | 2051     | 8.1         | 0.93                    | -0.6             |
| <i>Month</i> |          |             |                         |                  |
| January      | 2731     | 5.2         | 0.97                    | 0.7              |
| February     | 2971     | 5.8         | 0.98                    | -0.7             |

|           |      |     |      |      |
|-----------|------|-----|------|------|
| March     | 1816 | 6.8 | 0.96 | -1.0 |
| April     | 2277 | 4.3 | 0.97 | 0.3  |
| May       | 3041 | 5.6 | 0.94 | 0.1  |
| June      | 4077 | 9.0 | 0.92 | -1.1 |
| July      | 3601 | 9.6 | 0.86 | -0.1 |
| August    | 3922 | 7.5 | 0.94 | 1.0  |
| September | 4121 | 6.6 | 0.93 | 0.2  |
| October   | 2240 | 4.9 | 0.91 | 1.2  |
| November  | 1511 | 3.9 | 0.97 | -0.4 |
| December  | 1788 | 4.4 | 0.97 | 0.8  |

- 60 Table S2 Regional artificial neural network Northeast Pacific  $p\text{CO}_2$  product performance at varying resolutions against training and independent withheld SOCAT  $p\text{CO}_2$  observations. Mean and standard deviation between lower 10<sup>th</sup> percentile (5 of 50 runs) of overfitting metric values for each resolution with varying internal data division ratios between the  $p\text{CO}_2$  training data used by the ANN to train and internally evaluate. Number of observations (N), root mean squared error (RMSE), coefficient of determination ( $r^2$ ), mean absolute error (MAE), mean bias (calculated as the mean residual), and the slope of the linear regression
- 65 (c<sub>1</sub>). Courser resolution product uncertainties are also included where overall  $p\text{CO}_2$  product uncertainty ( $\theta_{p\text{CO}_2}$ ) is calculated from the square root of the sum of the three squared errors: observational uncertainty ( $\theta_{obs}$ ), gridding uncertainty ( $\theta_{grid}$ ), and ANN interpolation uncertainty ( $\theta_{map}$ ). The 10-fold ensemble approach was not run for the courser resolution products, likely leading to a slight underestimate of overall uncertainty as ANN run randomness uncertainty ( $\theta_{run}$ ) was excluded.

| <i>Training data</i>                       |                |                 |                         |                         |                      |            |
|--------------------------------------------|----------------|-----------------|-------------------------|-------------------------|----------------------|------------|
| <b>Resolution</b>                          | <b>N</b>       | <b>RMSE</b>     | <b><math>r^2</math></b> | <b>Mean Bias</b>        | <b>c<sub>1</sub></b> | <b>MAE</b> |
| 1°                                         | 2547           | 11.8±0.6        | 0.79±0.02               | -0.1±0.1                | 0.73±0.02            | 8.8±0.5    |
| 1/2°                                       | 5569           | 10.9±0.7        | 0.83±0.02               | 0.1±0.2                 | 0.77±0.02            | 7.9±0.6    |
| 1/4°                                       | 11253          | 11.3±0.9        | 0.82±0.03               | 0.0±0.1                 | 0.77±0.03            | 8.2±0.7    |
| 1/8°                                       | 21869          | 12.2±1.0        | 0.79±0.03               | 0.0±0.2                 | 0.74±0.03            | 8.8±0.8    |
| 1/12°                                      | 31392          | 10.5±1.0        | 0.84±0.03               | 0.0±0.2                 | 0.79±0.03            | 7.4±0.8    |
| <i>Independent withheld data</i>           |                |                 |                         |                         |                      |            |
| 1°                                         | 155            | 11.7±0.3        | 0.76±0.01               | -0.7±0.5                | 0.88±0.01            | 8.4±0.1    |
| 1/2°                                       | 350            | 11.5±0.6        | 0.78±0.02               | 0.1±0.7                 | 0.93±0.03            | 8.3±0.5    |
| 1/4°                                       | 716            | 11.5±0.8        | 0.79±0.03               | 0.1±0.6                 | 0.98±0.02            | 8.6±0.7    |
| 1/8°                                       | 1387           | 12.5±0.6        | 0.76±0.01               | -0.1±1.2                | 0.93±0.04            | 9.2±0.5    |
| 1/12°                                      | 1857           | 11.4±0.5        | 0.79±0.01               | 2.1±0.6                 | 0.92±0.03            | 8.4±0.5    |
| <i>pCO<sub>2</sub> product uncertainty</i> |                |                 |                         |                         |                      |            |
|                                            | $\theta_{obs}$ | $\theta_{grid}$ | $\theta_{map}$          | $\theta_{p\text{CO}_2}$ |                      |            |
| 1°                                         | 3.1            | 3.7             | 11.7                    | 12.6                    |                      |            |
| 1/2°                                       | 3.1            | 2.8             | 11.5                    | 12.3                    |                      |            |
| 1/4°                                       | 3.1            | 2.0             | 11.5                    | 12.2                    |                      |            |
| 1/8°                                       | 3.1            | 2.0             | 12.5                    | 13.0                    |                      |            |
